# Supplementary material for: Evaluation of Training to Increase Knowledge of the Addendum Guidelines for the Prevention of Peanut Allergy in the US
Source: PubMed Central journal article supplement (PMC10313145; doi:10.1001/jamanetworkopen.2023.4706), 2023-03-24
Supplement: jamanetwopen-e234706-s001.pdf [file jamanetwopen-e234706-s001.pdf]

## Data Sharing Statement

Samady. Evaluation of Training to Increase Knowledge of the Addendum Guidelines for the Prevention of Peanut Allergy in the US. *JAMA Netw Open*. Published March 24, 2023. doi:10.1001/jamanetworkopen.2023.4706

### Data

**Data available:** No
